# Supplementary material for: Qualitative Study to Explore the Occupational and Reproductive Health Challenges among Women Tobacco Farm Laborers in Mysore District, India
Source: Preprints.org preprint supplement (doi:10.20944/preprints202404.0800.v1), 2024-04-11
Supplement: Supplementary file 1 [file supplementary]

**Appendix 1 - Interview questions**

1. **Demographics**

|  | **Question** | **Response** |
| --- | --- | --- |
|  | Age (in years) |  |
|  | Date of Birth |  |
|  | Place of Birth, district and State |  |
|  | What is your marital status? | Single 1  Married 2  Widow 3  Separated/divorced 4  Others, specify 5  Refused 99 |
|  | What religion do you follow? | Hindu 1  Muslim 2  Sikh 3  Christian 4  Jain 5  Buddhism 6  No religion 7  Others (specify) 8  No response 9  Refused 99 |
|  | Do you belong to particular caste? | Scheduled Caste 1  Scheduled Tribes 2  Other Backward Caste 3  General Caste 4  Refused 99 |
|  | Years of Education |  |
|  | Level of education | Professional degree/Post graduate 1  Graduate degree 2  Secondary school /Intermediary 3  High school (class VI to X) 4  Primary School (upto Class V) 5  *Literate, no formal education 6  **Illiterate 7  Refused 99 |
|  | What is your total annual  Household income? | Rs. …………………… |

1. **History of tobacco farming:**

|  | Activity | Yes | No | How many hours in a day do you work? | How many years do you do this work? |
| --- | --- | --- | --- | --- | --- |
|  | Cultivation |  |  |  |  |
|  | Harvesting |  |  |  |  |
|  | Curing/ drying |  |  |  |  |
|  | Sorting |  |  |  |  |
|  | Stacking |  |  |  |  |
|  | Packing |  |  |  |  |

1. **History of tobacco use:**

|  |  |  | |  | |
| --- | --- | --- | --- | --- | --- |
|  | Have you ever used tobacco in any form (Smoking, chewing, snuff, etc)? | Yes 1  No 2 | | If no go to Q.9 | |
|  | In what forms have you consumed tobacco? | Smoking 1  Smokeless 2 | |  | |
|  | At what age did you first started smoking regularly? | …………… in years | | | |
|  | At what age did you first started using smokeless tobacco regularly? | …………… in years | | | |
|  | Do you currently consume tobacco? | Yes 1  No 2 | | | |
|  | Have you consumed tobacco in the last 12 months? (past user) | Yes 1  No 2 | | | |
|  | Quantity and duration of use (both current and past users) | | | | |
| Type of tobacco used | | Frequency per day | Duration of use | If Quit, since | |
| Years | Months |
| Smoking  Tobacco | Bidi |  |  |  |  |
| Cigarette |  |  |  |  |
| Cigar/Hukka/Chillum/Pipe |  |  |  |  |
| Smokeless  Tobacco | Khaini |  |  |  |  |
| Gutka |  |  |  |  |
| Chewing tobacco |  |  |  |  |
| Pan with Zarda |  |  |  |  |
| Snuff |  |  |  |  |
| Oral tobacco – Gul, Kiwam |  |  |  |  |
| Arecanut without tobacco | Pan without zarda |  |  |  |  |
| Supari |  |  |  |  |
|  | Are you exposed to tobacco smoke from others?  (e.g. at home, at workplace, while travelling, any other place) | Yes 1  No 2 | | | |
|  | Did you consume tobacco when you were pregnant? | Yes 1  No 2  Occasionally 3 | | | |

1. **Occupational and reproductive health:**

**Total number of pregnancies: …………**

**History of abortion / miscarriage / death of child:**

1. Atleast one abortion: Yes / No / Don’t know / Refuse
2. Miscarriage: Yes / No / Don’t know / Refuse
3. Death of child: Yes / No / Don’t know / Refuse

|  | Questions | Yes | No | Don’t know | Refuse to answer |
| --- | --- | --- | --- | --- | --- |
|  | Have you ever been involved in tobacco farming when you were pregnant? |  |  |  |  |
|  | Have you ever been exposed to tobacco dust when you were pregnant? |  |  |  |  |
|  | Do you use protective clothing when handling pesticides during pregnancy? |  |  |  |  |
|  | Did you develop any allergies during your pregnancy? |  |  |  |  |
|  | Did you develop any allergies after child birth? |  |  |  |  |
|  | Did your child develop any allergies or respiratory problems within 6 months of birth? |  |  |  |  |
|  | Did your child develop any allergies or respiratory problems within 1 year of birth? |  |  |  |  |

**APPENDIX B**

**Focus group discussion question guide based on social ecological model**

| **Socioecological model** | **Question** | **Prompts** |
| --- | --- | --- |
| Individual | How is your health? Do you think you are healthy? | How is your reproductive health? (Periods, pregnancy or menopause) |
| How was your pregnancy and child birth? | What type of farming work did you do during pregnancy? |
| Can you talk about the personal protection like gloves, boots, mask use while handling tobacco? When you use these? | How often do you to get access to these? |
| What do you know about the effects of tobacco use during pregnancy and lactation? | What was the source of these information? |
| What were the challenges you faced during your periods by working in tobacco farms? |  |
| What were the challenges you faced during your pregnancy by working in tobacco farms? |  |
| What type of problems do you think could occur in pregnancy due tobacco use? |  |
| Interpersonal | What are your thoughts about tobacco dust and/or smoke around you during pregnancy? |  |
| What type health problems are there in your family? | How often do you go to doctor for this problem? |
| What type of support did you receive from you family and friends during pregnancy? | What type of support you wish you had? |
| Organisational | What type of support or services did you receive from your farming organisation during your pregnancy and child birth? | What type of resources you wish you had? |
| What type of tobacco cessation programs or recourses are available to you? | What type of resources you think is missing? |
| Community | Can you elaborate on the maternity benefits you received from your community? | What were the challenges in receiving the benefits? |
| Policy | To your knowledge, what type of policies or programs are there for women tobacco farmers? | What type of policies do you think is required? |
| Closing question | Is there anything else you would like to share with me? | About your health?  About your family and community? |
